# Supplementary material
Source: Springer Nature journal article supplement (https://www.springermedizin.de/resource/supplementary/12904_2011_106_MOESM4_ESM.pdf/9517508)

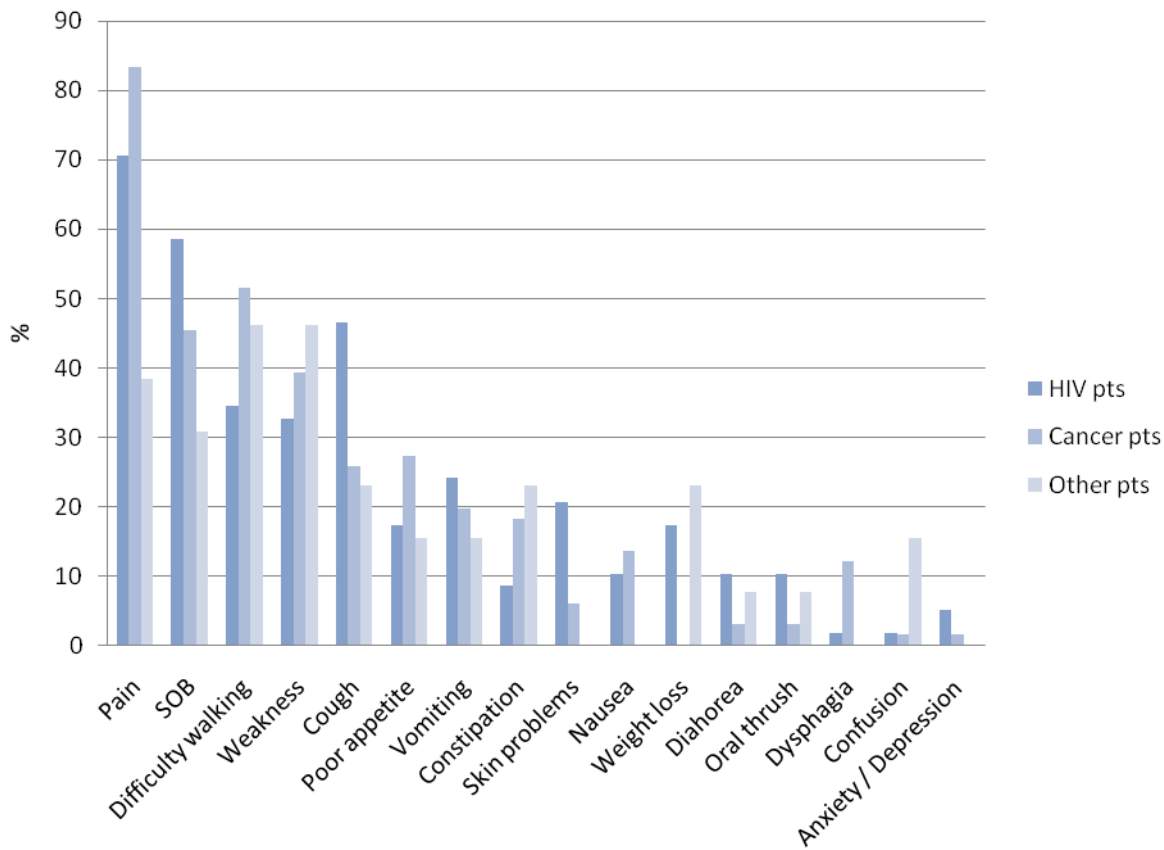

Supplement: MOESM4 [file 9517508]
